# Supplementary material for: Advanced Oxidation Protein Products Contribute to Chronic-Kidney-Disease-Induced Adipose Inflammation through Macrophage Activation
Source: MDPI journal article supplement (doi:10.3390/toxins15030179), 2023-02-26
Supplement: s1 [file s1]

# Supplementary Materials: Advanced oxidation protein products contribute to chronic kidney disease-induced adipose inflammation through macro-phage activation

Nanaka Arimura, Hiroshi Watanabe, Hiromasa Kato, Tadashi Imafuku, Takehiro Nakano, Miyu Sueyoshi, Mayuko Chikamatsu, Kai Tokumaru, Taisei Nagasaki, Hitoshi Maeda, Motoko Tanaka, Kazutaka Matsushita and Toru Maruyama

**Table S1.** Sequence of primers used for mRNA detection.

| Primer Name | Forward Primer Sequence (5'-3') | Reverse Primer Sequence (5'-3') |
|-------------|---------------------------------|---------------------------------|
| Mouse MCP-1 | GATGCAGTTAACGCCCCACT            | GAGCTTGGTGACAAAACTACAG          |
| Mouse TNF-  | TAGCCCACGTCGTAGCAAAC            | GCAGCCTTGTCCTTGAAGA             |
| Mouse IL-6  | ACAAAGCCAGAGTCCTTCAGAG          | TGTGACTCCAGCTTATCTCTTGG         |
| Mouse iNOS  | AGTCAACTGCAAGAGAACGGA           | GAAGAGAAACTTCCAGGGGCA           |
| Mouse CD206 | TTCAGCTATTGGACGCGAGG            | GAATCTGACACCCAGCGGAA            |
| Mouse GAPDH | AACTTTGGCATTGTGGAAGG            | ACACATTGGGGGTAGGAACA            |

**Table S2.** Renal function and body weight profile for control or adenine-induced CKD mice.

|                 | Control     | CKD                      |
|-----------------|-------------|--------------------------|
| BUN (mg/dL)     | 43.3 ± 1.6  | 119.7 ± 2.2 <sup>a</sup> |
| SCr (mg/dL)     | 0.40 ± 0.04 | 0.69 ± 0.02 <sup>a</sup> |
| Body weight (g) | 27.1 ± 0.2  | 23.1 ± 0.4 <sup>a</sup>  |

Data are expressed as the mean ± SE (*n* = 5). <sup>a</sup> *P* < 0.01 compared with control. BUN, blood urea nitrogen; SCr, serum creatinine.

**Table S3.** Renal function and body weight for control, HSA-overloaded or AOPPs-overloaded mice.

|                 | Control     | HSA         | AOPPs                   |
|-----------------|-------------|-------------|-------------------------|
| BUN (mg/dL)     | 26.4 ± 1.1  | 29.8 ± 2.1  | 35.7 ± 2.4 <sup>a</sup> |
| SCr (mg/dL)     | 0.21 ± 0.02 | 0.23 ± 0.01 | 0.17 ± 0.04             |
| Body weight (g) | 42.9 ± 1.7  | 44.4 ± 0.9  | 43.3 ± 1.4              |

Data are expressed as the mean ± SE (*n* = 4). <sup>a</sup> *P* < 0.05 compared with control. BUN, blood urea nitrogen; SCr, serum creatinine.
